# Supplementary material for: Direct growth of NiCo2Sx nanostructures on stainless steel with enhanced electrocatalytic activity for methanol oxidation
Source: Royal Society of Chemistry journal article supplement (doi:10.1039/c4ra11008k), 2014-12-05
Supplement: c4ra11008k1.pdf [file c4ra11008k1.pdf]

## Electronic Supporting Informations

### **Direct growth of NiCo<sub>2</sub>S<sub>x</sub> nanostructures on stainless steel with enhanced electrocatalytic activity for methanol oxidation**

Lei Qian<sup>a\*</sup>, Wen Chen<sup>a</sup>, Rongfu Huang<sup>a</sup>, Dan Xiao<sup>b</sup>

- a. College of materials and chemistry & chemical engineering, Chengdu University of Technology, Chengdu, Sichuan, 610059, China. E-mail: qianlei13@cdut.cn
- b. College of chemistry, Sichuan University, Chengdu, Sichuan, 610064, China.

#### Experimental section

##### *Direct growth of NiCo<sub>2</sub>S<sub>x</sub> nanostructures on SS substrate*

Before electrodeposition, SS substrates were cleaned in an ultrasonic bath in dilute HNO<sub>3</sub>, acetone and water sequently. During the electrodeposition process, SS was used as working electrode, Pt wire and saturated calomel electrode (SCE) were used as counter and reference electrode. Co-Ni double hydroxide (Co-Ni LDHs) were electrodeposited on SS substrate in a aqueous electrolyte with 0.02 M Co(NO<sub>3</sub>)<sub>2</sub> and 0.01 M Ni(NO<sub>3</sub>)<sub>2</sub> at a deposition potential of -1.0 V and deposition time of 30 min. After cleaned with water, the Co-Ni LDHs/SS were inserted into a 0.2 M Na<sub>2</sub>S solution. Finally, after vulcanized overnight, the Co-Ni LDHs were fully converted into NiCo<sub>2</sub>S<sub>x</sub>. The NiCo<sub>2</sub>S<sub>x</sub> on ITO substrate were synthesized by the same method using ITO as substrate. The NiCo<sub>2</sub>S<sub>x</sub> on ITO were used for cross-sectional SEM characterization because the ITO is fragile, in the process of obtaining the cross section, the morphology of the Ni-Co LDHs can be fully preserved. The NiS<sub>x</sub> or the CoS<sub>x</sub> were synthesized by the same method using Ni(NO<sub>3</sub>)<sub>2</sub> or Co(NO<sub>3</sub>)<sub>2</sub> as Ni source or Co source.

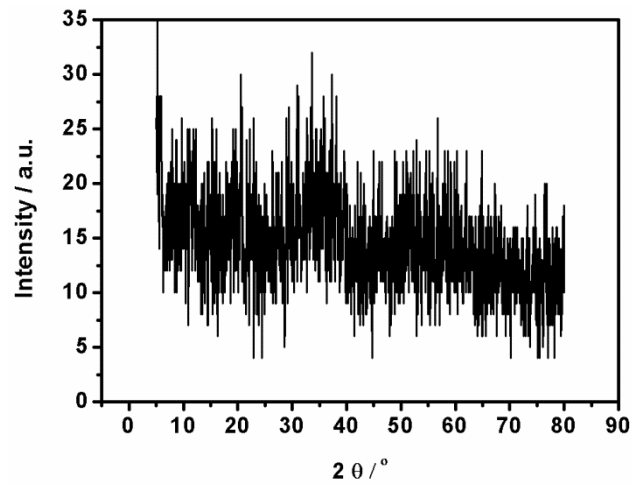

Fig. S1 XRD pattern of  $\text{NiCo}_2\text{S}_x$  after vulcanization before calcination.

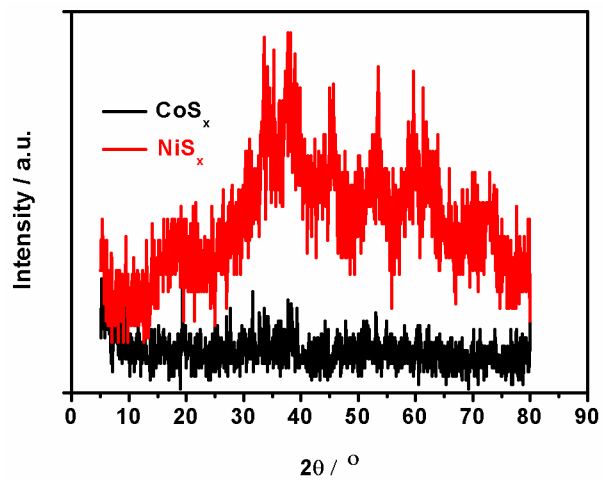

Fig. S2 XRD patterns of  $\text{NiS}_x$  and  $\text{CoS}_x$ .

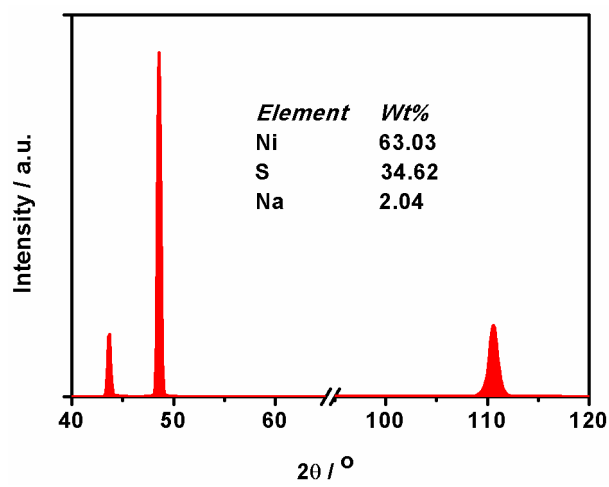

Fig. S3 XRF pattern of  $\text{NiS}_x$ .

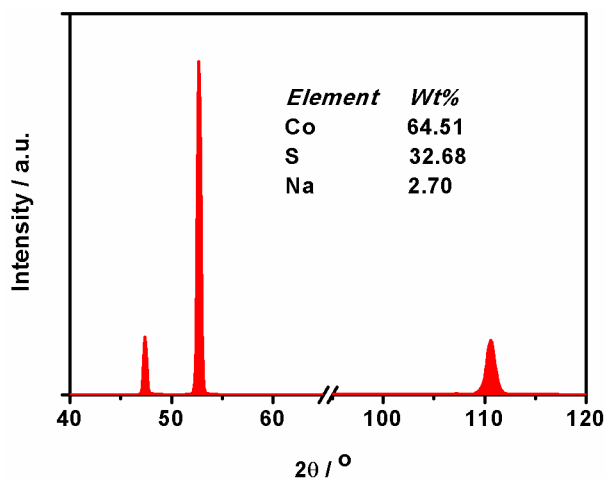

Fig. S4 XRF pattern of CoS<sub>x</sub>.

The methanol oxidation performance on Co-Ni LDHs/SS and blank SS were investigated by CV and chronoamperometry methods. The results were shown in Fig S5, S6 and S7.

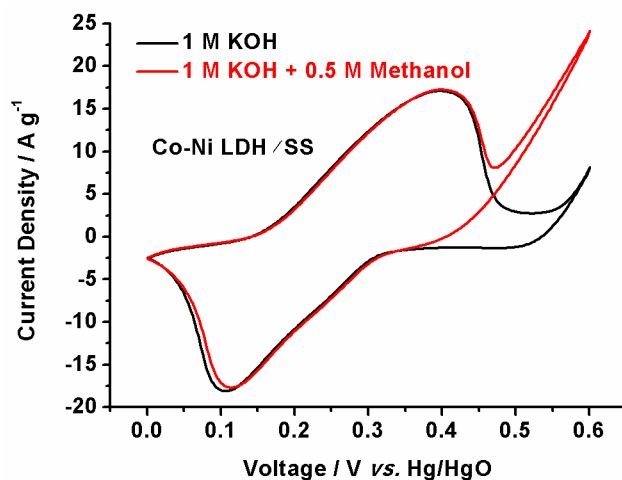

Fig. S5 CV curves of Co-Ni LDHs/SS electrode in 1 M KOH electrolyte without (black) and with (red) 0.5 M methanol at a scan rate of 10 mV s<sup>-1</sup>.

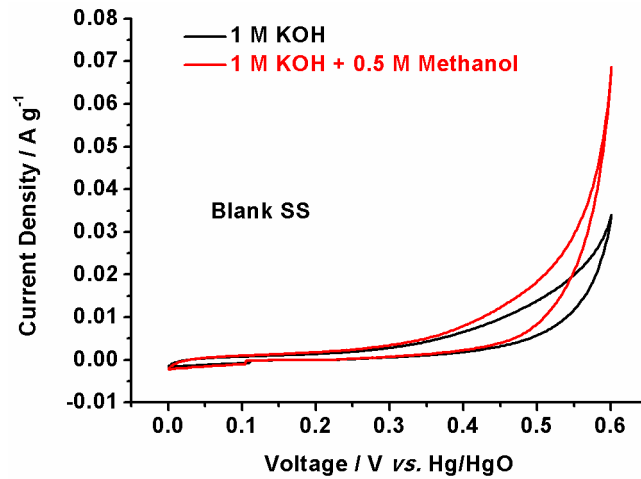

Fig. S6 CV curves of blank SS electrode in 1 M KOH electrolyte without (black) and with (red) 0.5 M methanol at a scan rate of 10 mV s<sup>-1</sup>.

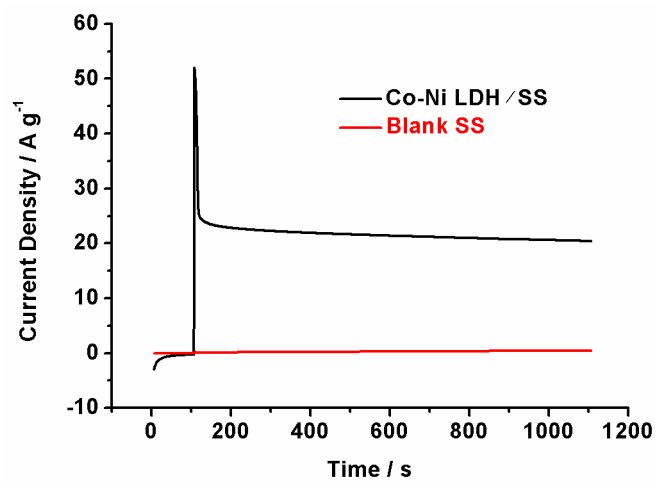

Fig. S7. Chronoamperometry curves of Co-Ni LDHs/SS (black) and blank SS (red) electrode in 1 M KOH electrolyte with 0.5 M methanol at 0 V (0-100 s) and 0.6 V (101-1100 s).
